# Supplementary material for: Early Transcriptional Response to DNA Virus Infection in Sclerotinia sclerotiorum
Source: PubMed Central journal article supplement (PMC6466436; doi:10.3390/v11030278), 2019-03-19
Supplement: viruses-11-00278-s001.pdf [file viruses-11-00278-s001.pdf]

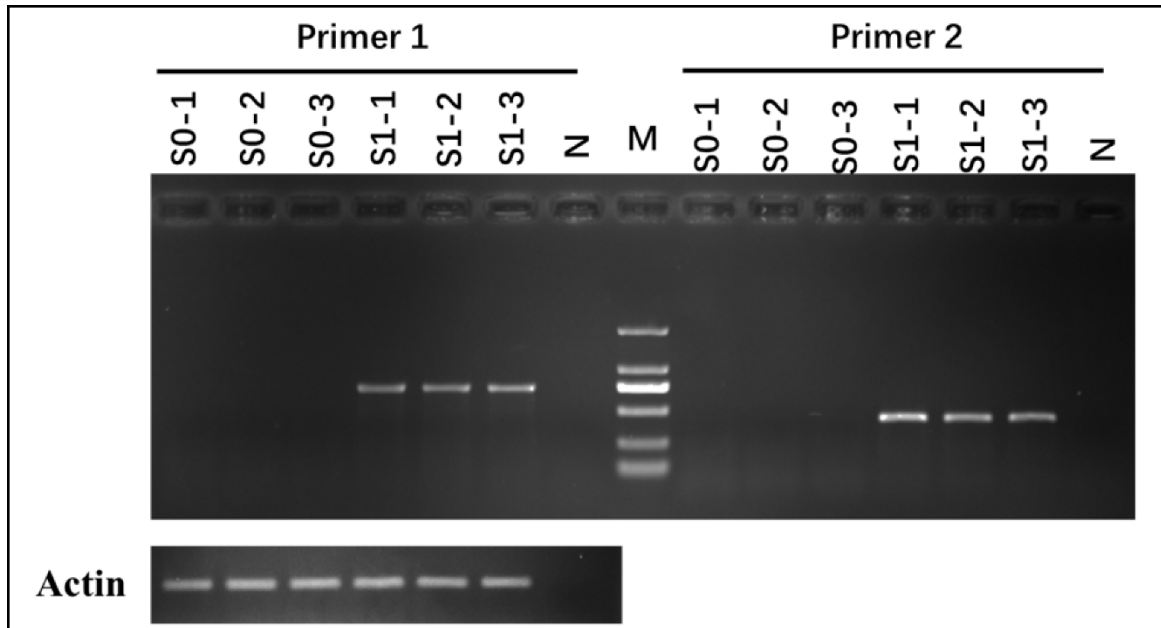

**Figure S1.** Two pairs of different virus primers to detect the sample's cDNA. The left Primer1 is for the virus Cp primer detection, the right Primer2 is for the virus Rep primer detection. The DNA marker is where DL2000 is. S0 and S1 represent the experimental group and the control group, respectively, biologically repeated three times. N, PCR negative control; M, DNA marker DL2000.

A

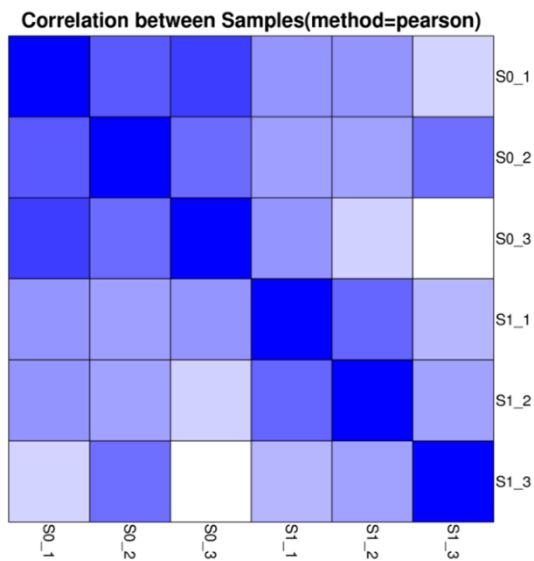

B

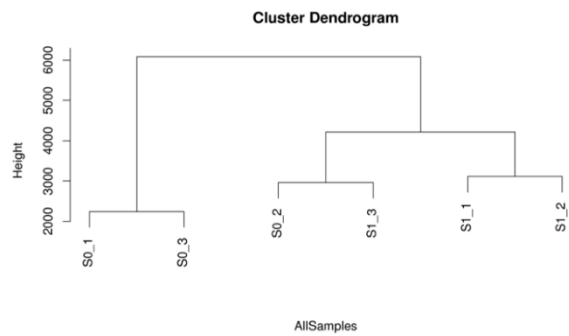

**Figure S2.** Cluster analysis between samples. (A) Heatmap of Pearson correlation between samples. Both X- and Y-axis represent each sample. Coloring indicates Pearson correlation (high: blue; low: white). (B) Hierarchical clustering between samples. The closer the samples the more similar the expression profile between samples.

A

### Gene Ontology:Molecular Function

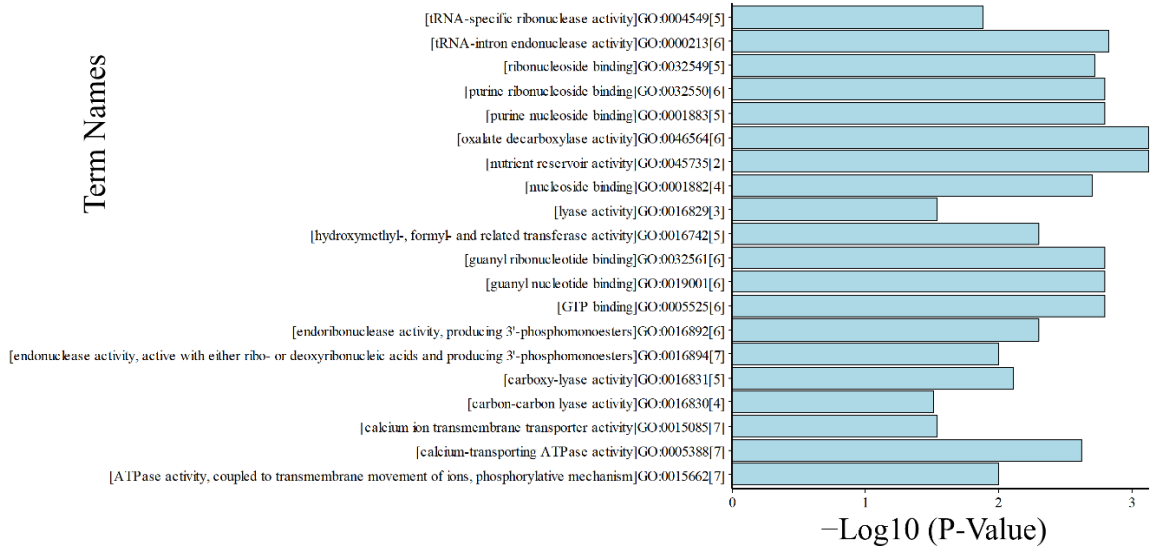

B

### Gene Ontology:Biological Process

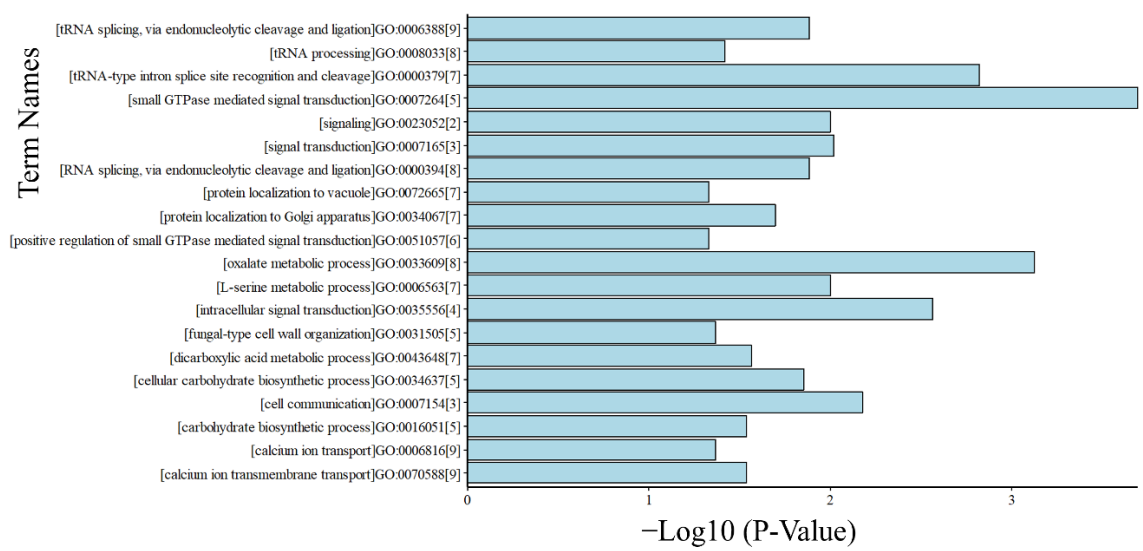

C

### Gene Ontology: Cellular Component

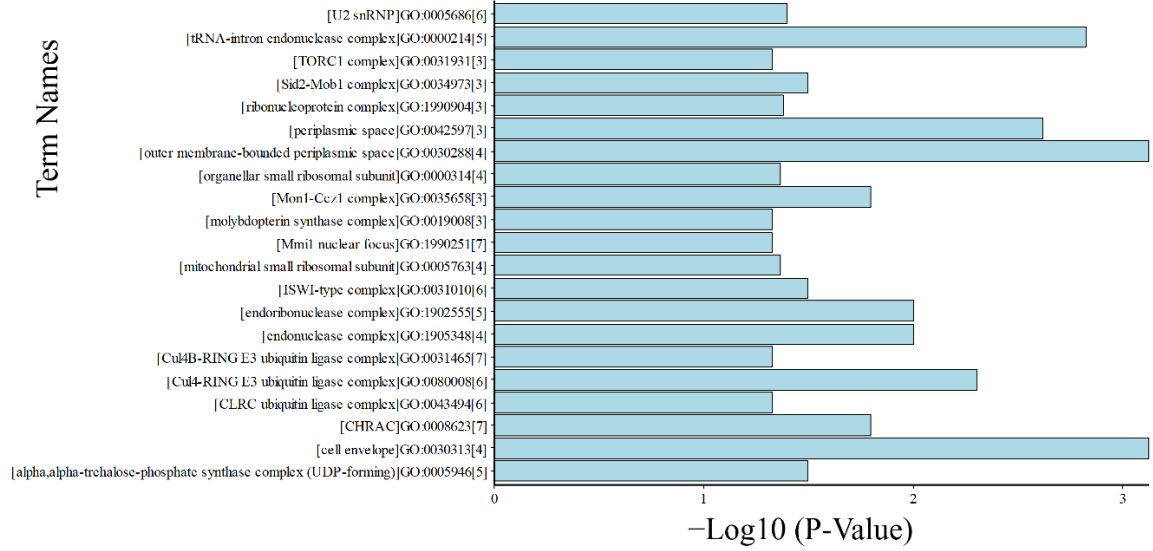

**Figure S3.** Gene ontology analysis of DEGs. GO has three ontologies: (A) Molecular function, (B) biological process, and (C) cellular component. In each bar chart, the X-axis represents  $-\text{Log}_{10}$  (p-value), the Y-axis represents GO term. Each number in square brackets at the Y-axis is the level of the hierarchical relationship.

Table S1. Statistics table of virus sequencing data.

|                   | SsHADV-Cp          |                   | SsHADV-Rep         |                   |
|-------------------|--------------------|-------------------|--------------------|-------------------|
|                   | count <sup>c</sup> | FPKM <sup>d</sup> | count <sup>c</sup> | FPKM <sup>d</sup> |
| S0_1 <sup>a</sup> | 0                  | 0                 | 0                  | 0                 |
| S0_2 <sup>a</sup> | 0                  | 0                 | 0                  | 0                 |
| S0_3 <sup>a</sup> | 0                  | 0                 | 0                  | 0                 |
| S1_1 <sup>b</sup> | 3                  | 0.83              | 1                  | 0.26              |
| S1_2 <sup>b</sup> | 3                  | 0.79              | 1                  | 0.25              |
| S1_3 <sup>b</sup> | 6                  | 1.71              | 0                  | 0                 |

<sup>a</sup>S0\_1, S0\_2, S0\_3: Three biological replicates of SsHADV-1 free sample.

<sup>b</sup>S1\_1, S1\_2, S1\_3: Three biological replicates of SsHADV-1 infection sample.

<sup>c</sup>Counts are the number of reads overlapping Cp or Rep gene.

<sup>d</sup>FPKMs means fragments per kilobase of exon per million reads, which describes the amount of gene expression.

Table S2. Gene Expression in KEGG: Biosynthesis of antibiotics and secondary metabolites.

| ID              | S0-Expression | S1-Expression | log <sub>2</sub> FoldChange (S1/S0) | Probability | Up/Down (S1/S0) |
|-----------------|---------------|---------------|-------------------------------------|-------------|-----------------|
| sscle_02g012230 | 0.01          | 6.67          | 9.381543                            | 0.812541    | Up              |
| sscle_12g087390 | 0.01          | 3.065         | 8.259743                            | 0.635478    | Up              |
| sscle_12g087390 | 0.01          | 3.065         | 8.259743                            | 0.635478    | Up              |
| sscle_03g029040 | 0.295         | 6.26          | 4.407376                            | 0.719771    | Up              |

|                 |        |       |          |          |      |
|-----------------|--------|-------|----------|----------|------|
| sscle_12g089330 | 0.34   | 4.705 | 3.790588 | 0.645031 | Up   |
| sscle_05g045470 | 3.79   | 13.99 | 1.884126 | 0.774562 | Up   |
| sscle_08g064900 | 1.96   | 6.65  | 1.762501 | 0.636415 | Up   |
| sscle_09g069640 | 9.915  | 1.25  | -2.98768 | 0.770863 | Down |
| sscle_02g018280 | 9.555  | 0.01  | -9.90011 | 0.8737   | Down |
| sscle_09g073940 | 15.145 | 0.01  | -10.5646 | 0.92629  | Down |

Table S3. Gene Expression in KEGG: Endocytosis.

| Gene ID         | S0-Expression | S1-Expression | log2FoldChange (S1/S0) | Probability | Up/Down (S1/S0) |
|-----------------|---------------|---------------|------------------------|-------------|-----------------|
| sscle_13g094930 | 0.01          | 19.965        | 10.96326               | 0.947879    | Up              |
| sscle_03g026360 | 6.14          | 14.43         | 1.22106                | 0.712607    | Up              |

Table S4, Transcription data of internal reference genes.

| Gene ID         | S0-Expression | S1-Expression | log2FoldChange (S1/S0) | Probability | Up/Down (S1/S0) | Gene      |
|-----------------|---------------|---------------|------------------------|-------------|-----------------|-----------|
| sscle_12g088930 | 6993.305      | 6581.405      | -0.08758               | 0.295355    | - <sup>a</sup>  | Ubiquitin |
| sscle_14g099090 | 728.495       | 857.41        | 0.235066               | 0.530439    | - <sup>a</sup>  | Actin     |

<sup>a</sup>- indicates no significant difference

Table S5. Differential gene expression for subcellular localization (partial).

| Gene ID         | S0-Expression | S1-Expression | log2FoldChange (S1/S0) | Probability | Up/Down (S1/S0) | Localization <sup>a</sup> | PredHel <sup>b</sup> |
|-----------------|---------------|---------------|------------------------|-------------|-----------------|---------------------------|----------------------|
| sscle_13g093750 | 11.875        | 3.27          | -1.86056               | 0.751194    | Down            | Cell membrane             | 0                    |
| sscle_16g109000 | 11.63         | 4.71          | -1.30405               | 0.690831    | Down            | Cell membrane             | 0                    |
| sscle_02g020420 | 46.685        | 19.41         | -1.26616               | 0.824108    | Down            | Cell membrane             | 0                    |
| sscle_02g021100 | 5.415         | 11.38         | 1.071467               | 0.64667     | Up              | Cell membrane             | 0                    |
| sscle_08g066440 | 4.425         | 9.97          | 1.171916               | 0.640583    | Up              | Cell membrane             | 12                   |
| sscle_01g009520 | 3.46          | 8.265         | 1.256243               | 0.618619    | Up              | Cell membrane             | 6                    |
| sscle_09g071590 | 16.295        | 48.37         | 1.569683               | 0.848131    | Up              | Cell membrane             | 0                    |
| sscle_01g007300 | 1.635         | 8.835         | 2.433939               | 0.733961    | Up              | Cell membrane             | 1                    |
| sscle_05g045530 | 0.01          | 2.875         | 8.167418               | 0.618854    | Up              | Cell membrane             | 1                    |
| sscle_11g085910 | 0.01          | 4.12          | 8.686501               | 0.708439    | Up              | Cell membrane             | 5                    |
| sscle_02g019430 | 4.345         | 19.105        | 2.136522               | 0.822375    | Up              | Plastid                   | 0                    |
| sscle_08g063860 | 4.185         | 36.8          | 3.136406               | 0.8811      | Up              | Plastid                   | 0                    |
| sscle_03g029040 | 0.295         | 6.26          | 4.407376               | 0.719771    | Up              | Plastid                   | 0                    |
| sscle_12g087390 | 0.01          | 3.065         | 8.259743               | 0.635478    | Up              | Plastid                   | 0                    |

<sup>a</sup>Localization: DGEs in subcellular localization.

<sup>b</sup>PredHel: Number of predicted transmembrane domains.



Table S6. Oligonucleotide primers used for PCR and RT-qPCR.

| Gene ID         | Name   | Gene primers (5'→3')     | Gene ID         | Name                      | Gene primers (5'→3')     |
|-----------------|--------|--------------------------|-----------------|---------------------------|--------------------------|
| sscle_02g016130 | 6130F  | CGTGACTTGGTTCGTGTT       | sscle_09g071590 | 71590F                    | ACTTGGATGTTGCCTTACCTAA   |
|                 | 6130R  | TCGTAGTATTGGAGGTTCTTCT   |                 | 71590R                    | AGATGGAATGCTGACACTTGA    |
| sscle_01g002910 | 2910F  | ACAGAAGTCGCATCGCTAT      | sscle_08g066440 | 06440F                    | TATGGTTGGCGTGAGGTA       |
|                 | 2910R  | ATCATCAGAAGGAGGAAGTTGT   |                 | 06440R                    | ACTGTGGCGACTATCCTT       |
| sscle_06g053180 | 3180F  | AGATGGGAGTGGAATGAAGGA    | sscle_05g045530 | 45530F                    | ACGGAGGAGCATAAGGAAGAG    |
|                 | 3180R  | TGATGTGGCGAATAGCAAGTG    |                 | 45530R                    | GAGGCACAGCGGTATGAATG     |
| sscle_04g033400 | 3400F  | TGATGTTGATGATGAAGAGGAA   | sscle_01g007300 | 07300F                    | TCTGCCCTTGCTTTGTCTCT     |
|                 | 3400R  | GCCATAGTTTCTGCTGAGT      |                 | 07300R                    | AGCCACAGCACCATCCAT       |
| sscle_02g021100 | 1100F  | GAGAGTGATACGGTGGTTAGATTG | sscle_02g021100 | 21100F                    | GAGAGTGATACGGTGGTTAGATTG |
|                 | 1100R  | GCGATAGTAGAGGCGGGATA     |                 | 21100R                    | GCGATAGTAGAGGCGGGATA     |
| sscle_13g094930 | 4930F  | ATTTACCGTGTGGGATGT       | sscle_01g009520 | 09520F                    | CTGTCCGCTACGCTATTCTG     |
|                 | 4930R  | ATCTCTAAGTTCGTCTCATT     |                 | 09520R                    | ACCGCATACTTCCATCATT      |
| sscle_16g109000 | 9000F  | GCTGAAGACAAGGATGGAAAT    | sscle_11g085910 | 85910F                    | GACACCCAACAGCAAGAA       |
|                 | 9000R  | TGGTGATTGGACTGTGACT      |                 | 85910R                    | CTCGCCCTTCTCATTG         |
| sscle_08g066240 | 6240F  | GACTTCCTTCATCACTACC      | sscle_16g109000 | 09000F                    | GCTGAAGACAAGGATGGAAAT    |
|                 | 6240R  | CAAGCCAATCATTCTCAT       |                 | 09000R                    | TGGTGATTGGACTGTGACT      |
| sscle_02g020420 | 0420F  | GAGATGATGAGCCTACGA       | sscle_02g020420 | 20420F                    | GAGATGATGAGCCTACGA       |
|                 | 0420R  | TTGTTGTTGCGGACTTAG       |                 | 20420R                    | TTGTTGTTGCGGACTTAG       |
| sscle_13g093750 | 3750F  | GCTACTTCCCAACGCACTA      | sscle_13g093750 | 93750F                    | GCTACTTCCCAACGCACTA      |
|                 | 3750R  | ATAATCTTCTGTCCCGCTGTAT   |                 | 93750R                    | ATAATCTTCTGTCCCGCTGTAT   |
| sscle_03g031880 | 1880F  | CGCCTTACCAATCGCTAA       | sscle_08g063860 | 63860F                    | CCTTCTCCTCCCTTTCCAT      |
|                 | 1880R  | ACACTCTTCAAATCCAATCTCT   |                 | 63860R                    | TGATGTTGATGTAATGCGATGA   |
| sscle_09g073940 | 73940F | GCATTCCTGTTGGCTGATA      | sscle_14g097660 | 97660F                    | TAAGGAGTGCGAGGAAGAA      |
|                 | 73940R | TGGTAGTGGTGACGACAT       |                 | 97660R                    | TATCCAGCATCAGCAGTAGA     |
| sscle_05g048190 | 48190F | GGACAAGGAGGACAAGAG       | sscle_12g087390 | 87390F                    | CGGTTGAGACGGCGATTA       |
|                 | 48190R | CCACCACCGTATGAGTTAT      |                 | 87390R                    | TTGCGGTCATAGTTCTTCCAT    |
| sscle_10g079920 | 79920F | AACGGCAACAGCAGAATC       | sscle_12g088930 | ubiquitin-F               | CCACCTCACCTACATCTTC      |
|                 | 79920R | ACGAACATCAGTCCCTCAA      |                 | ubiquitin-R               | CGTAGCATCGGATAATGTTG     |
| sscle_06g048820 | 48820F | TGGTTACGGTCTCAATGG       | SsHADVLF        | ATTTTGTTTAAGGGGGCAGAGAATG |                          |
|                 | 48820R | ATGCTCCTTCTTGATGTA       | SsHADVLR        | CGGACGGAAGTTTCGCAGTAGA    |                          |
